# Supplementary material for: Drug therapy and other factors associated with the development of acute kidney injury in critically ill patients: a cross-sectional study
Source: PubMed Central journal article supplement (PMC6097492; doi:10.7717/peerj.5405), 2018-08-14
Supplement: peerj-06-5405-s001.pdf [file peerj-06-5405-s001.pdf]

| ctrl | codpesq | idade | sexo | corpele | setorig | histetil | tabagis | apache_ii | cid10             | comorb | iam | icc |
|------|---------|-------|------|---------|---------|----------|---------|-----------|-------------------|--------|-----|-----|
| 1    | 1       | 47    | 1    | 4       | 4       | 2        | 2       | 2         | AVC NAO ESPECI    | 2      | 1   | 1   |
| 2    | 2       | 34    | 1    | 4       | 4       | 3        | 1       | 1         | QUEIMADURA D      | 1      | 1   | 1   |
| 3    | 3       | 86    | 1    | 1       | 1       | 1        | 1       | 1         | INSUFICIENCIA R   | 2      | 1   | 1   |
| 4    | 4       | 18    | 2    | 2       | 2       | 3        | 1       | 2         | 42 TRAUMATISMOS   | 1      | 1   | 1   |
| 5    | 5       | 30    | 2    | 3       | 3       | 3        | 1       | 1         | TRAUMATISMOS      | 1      | 1   | 1   |
| 6    | 6       | 68    | 2    | 4       | 4       | 3        | 1       | 1         | AVC NAO ESPECI    | 2      | 1   | 1   |
| 7    | 7       | 58    | 2    | 2       | 2       | 3        | 2       | 1         | DISPNEIA          | 1      | 1   | 1   |
| 8    | 8       | 28    | 2    | 4       | 4       | 3        | 1       | 1         | FRATURA DO AC     | 1      | 1   | 1   |
| 9    | 9       | 60    | 2    | 4       | 4       | 1        | 1       | 1         | INSUFICIENCIA C   | 2      | 1   | 2   |
| 11   | 11      | 24    | 1    | 3       | 3       | 1        | 1       | 1         | GASTRITE NAO E    | 2      | 1   | 1   |
| 12   | 12      | 55    | 2    | 3       | 3       | 1        | 2       | 1         | 45 HEMATEMESE     | 2      | 1   | 1   |
| 13   | 13      | 55    | 1    | 2       | 2       | 1        | 1       | 1         | ASMA NAO ESPE     | 2      | 1   | 1   |
| 14   | 14      | 53    | 1    | 4       | 4       | 1        | 8       | 8         | HEMORRAGIA IN     | 1      | 1   | 1   |
| 15   | 15      | 35    | 2    | 3       | 3       | 1        | 8       | 8         | DM INSULINO DI    | 2      | 1   | 1   |
| 16   | 16      | 75    | 1    | 4       | 4       | 1        | 1       | 1         | ICC               | 2      | 1   | 2   |
| 17   | 17      | 83    | 1    | 2       | 2       | 3        | 1       | 1         | ATEROSCLEROSE     | 2      | 2   | 2   |
| 18   | 18      | 19    | 2    | 4       | 4       | 1        | 2       | 2         | TRAUMATISMO       | 1      | 1   | 1   |
| 19   | 19      | 45    | 2    | 1       | 1       | 1        | 1       | 1         | EPILEPSIA NAO E   | 2      | 1   | 1   |
| 20   | 20      | 62    | 2    | 5       | 5       | 3        | 2       | 1         | DOENCAS VASCL     | 2      | 2   | 1   |
| 23   | 23      | 55    | 2    | 4       | 4       | 3        | 2       | 2         | 45 HEMORRAGIA SI  | 1      | 1   | 1   |
| 24   | 24      | 70    | 2    | 4       | 4       | 1        | 2       | 1         | 47 AVC NAO ESPECI | 2      | 1   | 2   |
| 25   | 25      | 39    | 2    | 2       | 2       | 1        | 2       | 1         | ENFORCAMENTC      | 1      | 1   | 1   |
| 26   | 26      | 24    | 2    | 3       | 3       | 1        | 2       | 2         | TRAUMATISMOS      | 1      | 1   | 1   |
| 27   | 27      | 55    | 2    | 1       | 1       | 1        | 2       | 2         | PARADA CARDIA     | 2      | 2   | 2   |
| 28   | 28      | 61    | 1    | 1       | 1       | 1        | 1       | 1         | AVC NAO ESPECI    | 2      | 1   | 1   |
| 29   | 29      | 26    | 2    | 3       | 3       | 3        | 2       | 2         | HEMORRAGIA E)     | 1      | 1   | 1   |
| 30   | 30      | 27    | 1    | 1       | 1       | 1        | 1       | 2         | TRANSTORNOS M     | 2      | 1   | 1   |
| 31   | 31      | 39    | 1    | 4       | 4       | 3        | 1       | 1         | FISTULA DO INTE   | 1      | 1   | 1   |
| 32   | 32      | 84    | 2    | 2       | 2       | 1        | 2       | 1         | DOENCA DO AP/     | 2      | 1   | 1   |
| 33   | 33      | 45    | 2    | 2       | 2       | 3        | 2       | 1         | 16 AVC NAO ESPECI | 1      | 1   | 1   |

|    |    |    |   |   |   |   |   |                    |   |   |   |
|----|----|----|---|---|---|---|---|--------------------|---|---|---|
| 34 | 34 | 83 | 1 | 1 | 1 | 1 | 1 | AVC NAO ESPECI     | 2 | 1 | 1 |
| 35 | 35 | 27 | 2 | 4 | 1 | 8 | 8 | HEMOPTISE          | 1 | 1 | 1 |
| 36 | 36 | 25 | 2 | 4 | 3 | 2 | 2 | TRAUMATISMOS       | 2 | 1 | 1 |
| 37 | 37 | 77 | 1 | 4 | 3 | 1 | 1 | ATEROSCLEROSE      | 2 | 1 | 1 |
| 38 | 38 | 83 | 1 | 4 | 1 | 1 | 1 | INSUFICIENCIA R    | 2 | 1 | 1 |
| 39 | 39 | 19 | 1 | 4 | 1 | 1 | 1 | 14 DM INSULINO DI  | 2 | 1 | 1 |
| 40 | 40 | 39 | 2 | 3 | 3 | 1 | 1 | 14 FISTULA DO INTE | 2 | 1 | 1 |
| 41 | 41 | 54 | 2 | 1 | 3 | 1 | 1 | EMBOLIA E TROI     | 2 | 1 | 1 |
| 42 | 42 | 34 | 2 | 4 | 3 | 1 | 1 | 19 ABDOME AGUDC    | 2 | 1 | 1 |
| 43 | 43 | 74 | 2 | 4 | 1 | 1 | 1 | 13 CONCUSSAO CEF   | 2 | 2 | 2 |
| 44 | 44 | 22 | 1 | 4 | 1 | 2 | 2 | 16 EFEITO TOXICO I | 1 | 1 | 1 |
| 45 | 45 | 28 | 2 | 4 | 3 | 1 | 1 | RUPTURA DE AR      | 1 | 1 | 1 |
| 46 | 46 | 81 | 2 | 2 | 3 | 2 | 1 | 16 ATEROSCLEROSE   | 2 | 1 | 1 |
| 47 | 47 | 37 | 1 | 2 | 2 | 1 | 1 | 8 PARTO ESPONTA    | 2 | 1 | 1 |
| 48 | 48 | 46 | 1 | 4 | 1 | 1 | 1 | 25 SINDROME DO C   | 2 | 1 | 1 |
| 49 | 49 | 35 | 2 | 4 | 1 | 2 | 2 | 9 PNEUMONIA BA     | 1 | 1 | 1 |
| 50 | 50 | 51 | 2 | 4 | 2 | 1 | 1 | 11 HEMOPNEUMOT     | 2 | 1 | 1 |
| 51 | 51 | 41 | 2 | 4 | 3 | 1 | 1 | 42 TRAUMATISMOS    | 1 | 1 | 1 |
| 52 | 52 | 87 | 1 | 4 | 3 | 1 | 1 | 36 CONSTIPACAO     | 2 | 1 | 2 |
| 53 | 53 | 53 | 1 | 1 | 3 | 2 | 2 | 15 EMBOLIA E TROI  | 2 | 1 | 1 |
| 54 | 54 | 41 | 1 | 4 | 3 | 2 | 1 | 20 FERIMENTOS MI   | 2 | 1 | 1 |
| 55 | 55 | 46 | 1 | 1 | 1 | 2 | 2 | 40 OUTRAS PNEUM    | 2 | 1 | 1 |
| 56 | 56 | 18 | 2 | 2 | 3 | 1 | 1 | 31 TRAUMATISMOS    | 1 | 1 | 1 |
| 57 | 57 | 78 | 2 | 3 | 1 | 1 | 1 | 25 HEMORRAGIA IN   | 1 | 1 | 1 |
| 58 | 58 | 18 | 2 | 4 | 1 | 1 | 1 | 19 EPILEPSIA NAO E | 1 | 1 | 1 |
| 59 | 59 | 63 | 2 | 2 | 3 | 1 | 1 | AVC                | 2 | 2 | 1 |
| 60 | 60 | 69 | 2 | 4 | 3 | 2 | 1 | AVC NAO ESPECI     | 2 | 1 | 1 |
| 61 | 61 | 44 | 2 | 4 | 3 | 2 | 1 | EMBOLIA E TROI     | 1 | 1 | 1 |
| 62 | 62 | 74 | 1 | 1 | 3 | 1 | 1 | FRATURA PERTR      | 2 | 1 | 1 |
| 63 | 63 | 73 | 1 | 4 | 3 | 1 | 1 | 18 GANGRENA NAC    | 2 | 1 | 1 |
| 64 | 64 | 32 | 2 | 2 | 3 | 2 | 2 | 20 FRATURA DE MA   | 1 | 1 | 1 |

|    |    |    |   |   |   |   |   |                    |   |   |   |
|----|----|----|---|---|---|---|---|--------------------|---|---|---|
| 65 | 65 | 41 | 1 | 4 | 3 | 1 | 1 | 8 FRATURA DA EX    | 1 | 1 | 1 |
| 66 | 66 | 39 | 2 | 1 | 1 | 1 | 1 | 17 TRAUMATISMO     | 1 | 1 | 1 |
| 67 | 67 | 75 | 1 | 4 | 3 | 2 | 2 | 15 EMBOLIA E TROI  | 1 | 1 | 1 |
| 68 | 68 | 18 | 2 | 4 | 3 | 2 | 2 | 24 TRAUMATISMOS    | 2 | 1 | 1 |
| 69 | 69 | 80 | 1 | 4 | 3 | 1 | 2 | 27 OUTRAS OBSTR    | 2 | 1 | 1 |
| 70 | 70 | 47 | 2 | 4 | 2 | 2 | 1 | 9 GANGRENA NAC     | 2 | 1 | 1 |
| 71 | 71 | 60 | 2 | 1 | 1 | 1 | 2 | 24 SEPSE FOCO PUL  | 2 | 1 | 1 |
| 72 | 72 | 28 | 1 | 1 | 2 | 1 | 1 | 9 GRAVIDEZ DUPL    | 1 | 1 | 1 |
| 73 | 73 | 35 | 2 | 4 | 3 | 2 | 2 | 22 TRAUMATISMOS    | 2 | 1 | 2 |
| 74 | 74 | 48 | 2 | 4 | 1 | 2 | 1 | PNEUMONIA BA       | 2 | 1 | 2 |
| 75 | 75 | 66 | 2 | 1 | 1 | 1 | 2 | 24 FRATURA DE OU   | 1 | 1 | 1 |
| 76 | 76 | 28 | 2 | 2 | 3 | 1 | 1 | 20 FRATURA DA EX   | 1 | 1 | 1 |
| 77 | 77 | 24 | 2 | 4 | 3 | 2 | 2 | 13 TRAUMATISMOS    | 1 | 1 | 1 |
| 78 | 78 | 36 | 2 | 1 | 3 | 1 | 1 | 5 TRAUMATISMOS     | 1 | 1 | 1 |
| 79 | 79 | 81 | 1 | 2 | 2 | 1 | 1 | 25 AVC             | 2 | 1 | 1 |
| 80 | 80 | 31 | 2 | 2 | 3 | 2 | 2 | 15 FRATURA DA AB   | 1 | 1 | 1 |
| 81 | 81 | 64 | 2 | 4 | 3 | 2 | 2 | 11 GANGRENA NAC    | 2 | 2 | 2 |
| 82 | 82 | 37 | 2 | 1 | 3 | 1 | 1 | TRAUMATISMOS       | 2 | 1 | 1 |
| 83 | 83 | 46 | 2 | 4 | 1 | 1 | 1 | 24 INSUFICIENCIA R | 2 | 1 | 1 |
| 84 | 84 | 26 | 1 | 2 | 3 | 1 | 1 | 22 TRAUMATISMOS    | 1 | 1 | 1 |
| 85 | 85 | 54 | 1 | 4 | 3 | 1 | 1 | CALCULOSE DE V     | 1 | 1 | 1 |
| 86 | 86 | 79 | 1 | 4 | 3 | 1 | 1 | 20 ATEROSCLEROSE   | 2 | 1 | 1 |
| 87 | 87 | 77 | 1 | 1 | 3 | 1 | 1 | 26 AVC NAO ESPECI  | 2 | 1 | 1 |
| 88 | 88 | 86 | 1 | 1 | 2 | 1 | 1 | 17 FRATURA SUBTR   | 2 | 1 | 1 |
| 89 | 89 | 38 | 2 | 3 | 1 | 2 | 2 | 18 EPILEPSIA NAO E | 1 | 1 | 1 |
| 90 | 90 | 76 | 2 | 1 | 1 | 2 | 1 | 29 MIOCARDIOPATI   | 2 | 1 | 1 |
| 91 | 91 | 81 | 2 | 1 | 1 | 1 | 1 | ANGINA PECTOR      | 1 | 1 | 1 |
| 92 | 92 | 19 | 2 | 1 | 3 | 1 | 1 | 12 TRAUMATISMOS    | 2 | 1 | 1 |
| 93 | 93 | 34 | 1 | 4 | 1 | 1 | 1 | 18 EFEITO TOXICO I | 1 | 1 | 1 |
| 94 | 94 | 21 | 1 | 4 | 2 | 1 | 1 | 13 PARTO ESPONTA   | 2 | 1 | 1 |
| 95 | 95 | 56 | 2 | 1 | 3 | 2 | 2 | APENDICITE AGL     | 2 | 2 | 1 |

|     |     |    |   |   |   |   |   |                     |   |   |   |
|-----|-----|----|---|---|---|---|---|---------------------|---|---|---|
| 96  | 96  | 46 | 1 | 3 | 1 | 2 | 1 | 28 EPILEPSIA E SINC | 2 | 1 | 1 |
| 97  | 97  | 88 | 1 | 1 | 1 | 1 | 1 | 18 PNEUMONIA BA     | 2 | 1 | 1 |
| 98  | 98  | 21 | 2 | 2 | 3 | 2 | 2 | 18 TRAUMATISMOS     | 1 | 1 | 1 |
| 99  | 99  | 29 | 2 | 4 | 1 | 1 | 2 | ENCEFALITE VIR/     | 1 | 1 | 1 |
| 100 | 100 | 34 | 2 | 4 | 3 | 2 | 2 | 20 TRAUMATISMOS     | 1 | 1 | 1 |
| 101 | 101 | 25 | 2 | 2 | 3 | 2 | 2 | TRAUMATISMOS        | 1 | 1 | 1 |
| 102 | 102 | 85 | 1 | 4 | 1 | 1 | 1 | 28 AVC NAO ESPECI   | 1 | 1 | 2 |
| 103 | 103 | 63 | 1 | 1 | 1 | 2 | 1 | SEPTICEMIA NAC      | 1 | 1 | 1 |
| 104 | 104 | 20 | 2 | 4 | 3 | 1 | 1 | 17 SEQUELAS DE HE   | 1 | 1 | 1 |
| 105 | 105 | 20 | 2 | 4 | 3 | 1 | 1 | 23 TRAUMATISMOS     | 1 | 1 | 1 |
| 106 | 106 | 53 | 1 | 1 | 1 | 1 | 1 | 10 EFEITO TOXICO I  | 1 | 1 | 1 |
| 107 | 107 | 27 | 1 | 4 | 2 | 1 | 1 | 15 GRAVIDEZ ABDO    | 1 | 1 | 1 |
| 108 | 108 | 41 | 2 | 2 | 3 | 2 | 1 | 7 ABSCESSO E GRA    | 1 | 1 | 1 |
| 109 | 109 | 69 | 1 | 4 | 1 | 1 | 1 | 23 AVC NAO ESPECI   | 2 | 1 | 1 |
| 110 | 110 | 60 | 2 | 2 | 2 | 2 | 2 | AVC NAO ESPECI      | 1 | 2 | 2 |
| 111 | 111 | 70 | 2 | 4 | 1 | 1 | 1 | 30 PARADA CARDIA    | 1 | 1 | 2 |
| 112 | 112 | 74 | 2 | 4 | 3 | 1 | 1 | 10 OUTRAS FORMA     | 1 | 1 | 1 |
| 113 | 113 | 75 | 1 | 4 | 1 | 1 | 1 | 31 AVC              | 1 | 2 | 2 |
| 114 | 114 | 35 | 2 | 2 | 1 | 1 | 1 | EPILEPSIA NAO E     | 1 | 1 | 1 |
| 115 | 115 | 26 | 1 | 2 | 2 | 1 | 2 | 13 GRAVIDEZ TUBA    | 1 | 1 | 1 |
| 116 | 116 | 41 | 1 | 4 | 3 | 1 | 2 | OUTRAS DOENC,       | 1 | 1 | 1 |
| 117 | 117 | 75 | 1 | 4 | 2 | 1 | 1 | 2 FRATURA PERTR     | 1 | 1 | 1 |
| 118 | 118 | 82 | 2 | 1 | 1 | 2 | 1 | 27 ANURIA E OLIGU   | 2 | 1 | 1 |
| 119 | 119 | 39 | 1 | 4 | 1 | 1 | 2 | 13 HIPERTENSAO ES   | 1 | 1 | 1 |
| 120 | 120 | 19 | 2 | 4 | 3 | 2 | 2 | 22 FERIMENTOS MI    | 1 | 1 | 1 |
| 121 | 121 | 52 | 2 | 4 | 3 | 1 | 1 | 24 HEMOTORAX        | 1 | 1 | 1 |
| 122 | 122 | 24 | 2 | 4 | 1 | 2 | 1 | 15 PARADA CARDIA    | 1 | 1 | 1 |
| 123 | 123 | 82 | 1 | 1 | 1 | 1 | 2 | OUTROS SINTON       | 2 | 1 | 2 |
| 124 | 124 | 24 | 1 | 4 | 2 | 1 | 1 | PARTO ESPONTA       | 1 | 1 | 1 |
| 125 | 125 | 68 | 1 | 4 | 1 | 2 | 1 | AVC                 | 1 | 1 | 1 |







|   |   |   |   |   |   |   |   |   |   |   |   |   |   |
|---|---|---|---|---|---|---|---|---|---|---|---|---|---|
| 2 | 2 | 1 | 1 | 1 | 1 | 1 | 1 | 1 | 1 | 2 | 1 | 1 | 1 |
| 1 | 1 | 1 | 2 | 1 | 1 | 1 | 1 | 1 | 1 | 2 | 1 | 1 | 1 |
| 1 | 1 | 1 | 1 | 1 | 1 | 1 | 1 | 1 | 1 | 1 | 1 | 1 | 1 |
| 1 | 1 | 1 | 1 | 1 | 1 | 1 | 1 | 1 | 1 | 1 | 1 | 1 | 1 |
| 1 | 1 | 1 | 1 | 1 | 1 | 1 | 1 | 1 | 1 | 1 | 1 | 1 | 1 |
| 1 | 1 | 1 | 1 | 1 | 1 | 1 | 1 | 1 | 1 | 1 | 1 | 1 | 1 |
| 1 | 1 | 1 | 1 | 1 | 1 | 1 | 1 | 1 | 1 | 2 | 1 | 1 | 1 |
| 1 | 1 | 1 | 1 | 1 | 1 | 1 | 1 | 1 | 1 | 1 | 1 | 1 | 1 |
| 1 | 1 | 1 | 1 | 1 | 1 | 1 | 1 | 1 | 1 | 1 | 1 | 1 | 1 |
| 1 | 1 | 2 | 1 | 1 | 1 | 1 | 1 | 2 | 2 | 1 | 1 | 1 | 1 |
| 1 | 1 | 1 | 1 | 1 | 1 | 1 | 1 | 1 | 1 | 1 | 1 | 1 | 1 |
| 1 | 1 | 1 | 1 | 1 | 1 | 1 | 1 | 1 | 1 | 1 | 1 | 1 | 1 |
| 1 | 2 | 1 | 1 | 2 | 1 | 1 | 1 | 2 | 2 | 1 | 1 | 1 | 1 |
| 1 | 2 | 1 | 1 | 1 | 1 | 1 | 1 | 1 | 1 | 2 | 1 | 1 | 1 |
| 1 | 1 | 1 | 1 | 1 | 1 | 1 | 1 | 1 | 1 | 1 | 1 | 1 | 1 |
| 2 | 2 | 1 | 1 | 1 | 1 | 1 | 1 | 2 | 1 | 1 | 1 | 1 | 1 |
| 1 | 1 | 2 | 1 | 1 | 1 | 1 | 1 | 1 | 1 | 1 | 1 | 1 | 1 |
| 1 | 1 | 1 | 1 | 1 | 1 | 1 | 1 | 1 | 1 | 1 | 1 | 1 | 1 |
| 2 | 1 | 1 | 1 | 2 | 1 | 1 | 1 | 2 | 2 | 1 | 1 | 1 | 1 |
| 1 | 1 | 2 | 1 | 2 | 1 | 1 | 1 | 1 | 1 | 1 | 1 | 1 | 1 |
| 1 | 1 | 1 | 1 | 1 | 1 | 1 | 1 | 1 | 1 | 1 | 1 | 1 | 1 |
| 1 | 1 | 1 | 1 | 1 | 1 | 1 | 1 | 1 | 1 | 1 | 1 | 1 | 1 |
| 1 | 1 | 1 | 1 | 1 | 1 | 1 | 1 | 1 | 1 | 1 | 1 | 1 | 1 |
| 1 | 1 | 1 | 1 | 1 | 1 | 1 | 1 | 1 | 1 | 1 | 1 | 1 | 1 |
| 1 | 1 | 1 | 1 | 1 | 1 | 1 | 1 | 1 | 1 | 1 | 1 | 1 | 1 |
| 1 | 1 | 1 | 1 | 1 | 1 | 1 | 1 | 1 | 1 | 1 | 1 | 1 | 1 |
| 1 | 2 | 1 | 2 | 1 | 2 | 1 | 1 | 2 | 1 | 1 | 1 | 1 | 1 |
| 1 | 1 | 1 | 1 | 1 | 1 | 1 | 1 | 1 | 1 | 1 | 1 | 1 | 1 |
| 1 | 1 | 1 | 1 | 1 | 1 | 1 | 1 | 2 | 1 | 1 | 1 | 1 | 1 |



| linfoma | metastas | aids | preuti | posuti | sedado | trauma | vni | vm | infec | sepse | cradmiss | cruti | crultm |     |
|---------|----------|------|--------|--------|--------|--------|-----|----|-------|-------|----------|-------|--------|-----|
| 1       | 1        | 1    | 1      | 2      | 3      | 2      | 1   | 1  | 2     | 1     | 1        | 0,7   | 1,1    | 1,1 |
| 1       | 1        | 1    | 1      | 1      | 2      | 1      | 1   | 2  | 1     | 1     | 1        | 0,6   | 0,4    | 0,4 |
| 1       | 1        | 1    | 1      | 2      | 33     | 1      | 1   | 1  | 2     | 1     | 1        | 0,7   | 0,7    | 0,6 |
| 1       | 1        | 1    | 1      | 1      | 13     | 2      | 2   | 1  | 2     | 2     | 1        | 1,3   | 0,8    | 0,7 |
| 1       | 1        | 1    | 1      | 1      | 13     | 1      | 2   | 1  | 2     | 2     | 1        | 1     | 0,8    | 0,7 |
| 1       | 1        | 1    | 1      | 1      | 33     | 2      | 1   | 1  | 2     | 2     | 1        | 1     | 2,8    | 1,1 |
| 1       | 1        | 1    | 1      | 1      | 6      | 1      | 2   | 2  | 1     | 2     | 1        | 1,1   | 1,9    | 1,7 |
| 1       | 1        | 1    | 1      | 1      | 5      | 2      | 2   | 1  | 2     | 1     | 1        | 2     | 1,2    | 0,8 |
| 1       | 1        | 1    | 1      | 6      | 4      | 2      | 1   | 1  | 2     | 2     | 2        | 1,3   | 0,8    | 0,7 |
| 1       | 1        | 1    | 1      | 1      | 2      | 1      | 1   | 1  | 1     | 1     | 1        | 0,5   | 0,5    | 0,5 |
| 1       | 1        | 1    | 1      | 3      | 16     | 2      | 1   | 1  | 2     | 2     | 1        | 1,3   | 0,8    | 0,7 |
| 1       | 1        | 1    | 1      | 1      | 7      | 2      | 1   | 1  | 2     | 1     | 1        | 0,5   | 0,5    | 0,5 |
| 1       | 1        | 1    | 1      | 1      | 3      | 1      | 2   | 1  | 2     | 1     | 1        | 1,3   | 0,9    | 0,7 |
| 1       | 1        | 1    | 1      | 3      | 2      | 2      | 1   | 1  | 2     | 2     | 2        | 0,4   | 0,5    | 0,5 |
| 1       | 1        | 1    | 1      | 1      | 23     | 2      | 1   | 1  | 2     | 2     | 1        | 1,2   | 1,7    | 1,7 |
| 1       | 1        | 1    | 1      | 7      | 30     | 1      | 1   | 2  | 1     | 2     | 1        | 1,5   | 5,5    | 3,5 |
| 1       | 1        | 1    | 1      | 1      | 5      | 2      | 2   | 1  | 2     | 1     | 1        | 1     | 0,9    | 0,8 |
| 1       | 1        | 1    | 1      | 3      | 11     | 2      | 1   | 1  | 2     | 1     | 1        | 0,6   | 0,6    | 0,5 |
| 1       | 1        | 1    | 1      | 1      | 7      | 2      | 1   | 1  | 2     | 1     | 1        | 0,8   | 0,6    | 0,4 |
| 1       | 1        | 1    | 1      | 1      | 14     | 2      | 2   | 1  | 2     | 1     | 1        | 0,6   | 0,6    | 0,6 |
| 1       | 1        | 1    | 1      | 3      | 11     | 2      | 1   | 1  | 2     | 2     | 2        | 1,7   | 1      | 0,6 |
| 1       | 1        | 1    | 1      | 1      | 2      | 1      | 2   | 1  | 2     | 1     | 1        | 0,6   | 0,7    | 0,7 |
| 1       | 1        | 1    | 1      | 1      | 26     | 2      | 2   | 1  | 2     | 2     | 1        | 0,8   | 0,7    | 0,5 |
| 1       | 1        | 1    | 1      | 1      | 13     | 1      | 1   | 1  | 2     | 1     | 1        | 1,3   | 1,2    | 1   |
| 1       | 1        | 1    | 1      | 1      | 19     | 1      | 1   | 1  | 2     | 2     | 1        | 0,4   | 0,4    | 0,3 |
| 1       | 1        | 1    | 1      | 1      | 1      | 1      | 2   | 1  | 1     | 1     | 1        | 0,5   | 0,4    | 0,4 |
| 1       | 1        | 1    | 1      | 1      | 2      | 2      | 1   | 1  | 2     | 1     | 1        | 0,5   | 0,7    | 0,7 |
| 1       | 1        | 1    | 1      | 1      | 3      | 1      | 1   | 1  | 2     | 2     | 2        | 0,4   | 0,3    | 0,3 |
| 1       | 1        | 1    | 1      | 7      | 7      | 1      | 1   | 1  | 2     | 2     | 1        | 0,7   | 0,7    | 0,5 |
| 1       | 1        | 1    | 1      | 1      | 17     | 2      | 1   | 1  | 2     | 1     | 1        | 0,6   | 0,7    | 0,5 |

|   |   |   |   |    |   |   |   |   |   |   |     |     |     |
|---|---|---|---|----|---|---|---|---|---|---|-----|-----|-----|
| 1 | 1 | 1 | 5 | 7  | 1 | 1 | 2 | 1 | 1 | 1 | 1,2 | 1,1 | 1   |
| 1 | 1 | 1 | 1 | 2  | 2 | 1 | 1 | 2 | 1 | 1 | 0,9 | 0,5 | 0,3 |
| 1 | 1 | 1 | 1 | 3  | 1 | 2 | 1 | 2 | 1 | 1 | 0,9 | 0,9 | 0,9 |
| 1 | 1 | 1 | 4 | 1  | 1 | 1 | 1 | 1 | 1 | 1 | 1,1 | 1   | 1   |
| 1 | 1 | 1 | 1 | 5  | 1 | 1 | 1 | 2 | 1 | 1 | 0,6 | 0,7 | 0,6 |
| 1 | 1 | 1 | 1 | 1  | 1 | 1 | 1 | 1 | 2 | 1 | 0,7 | 0,6 | 0,6 |
| 1 | 1 | 1 | 6 | 6  | 1 | 2 | 1 | 1 | 1 | 1 | 0,3 | 0,5 | 0,4 |
| 1 | 1 | 1 | 1 | 5  | 1 | 1 | 1 | 1 | 1 | 1 | 1,5 | 3,6 | 3,6 |
| 1 | 1 | 1 | 1 | 27 | 1 | 1 | 1 | 2 | 2 | 2 | 1,7 | 0,9 | 0,4 |
| 1 | 1 | 1 | 1 | 3  | 1 | 2 | 2 | 1 | 1 | 1 | 0,7 | 0,6 | 0,6 |
| 1 | 1 | 1 | 1 | 6  | 2 | 1 | 1 | 2 | 1 | 1 | 0,7 | 0,7 | 0,7 |
| 1 | 1 | 1 | 1 | 26 | 2 | 2 | 1 | 2 | 1 | 1 | 1,4 | 1,1 | 0,9 |
| 1 | 1 | 1 | 3 | 5  | 1 | 1 | 2 | 1 | 1 | 1 | 0,6 | 0,8 | 0,6 |
| 1 | 1 | 1 | 1 | 2  | 1 | 1 | 1 | 1 | 1 | 1 | 0,7 | 0,6 | 0,6 |
| 1 | 1 | 1 | 1 | 5  | 1 | 1 | 2 | 1 | 1 | 1 | 0,5 | 0,6 | 0,5 |
| 1 | 1 | 1 | 6 | 5  | 1 | 1 | 2 | 1 | 1 | 1 | 0,9 | 1   | 1   |
| 1 | 1 | 1 | 6 | 4  | 1 | 2 | 2 | 1 | 1 | 1 | 0,7 | 0,8 | 0,8 |
| 1 | 1 | 1 | 1 | 2  | 1 | 2 | 2 | 1 | 2 | 1 | 0,7 | 0,9 | 0,9 |
| 1 | 1 | 1 | 1 | 74 | 2 | 1 | 1 | 2 | 2 | 1 | 0,8 | 1,4 | 0,8 |
| 1 | 1 | 1 | 1 | 3  | 2 | 1 | 2 | 1 | 1 | 1 | 0,5 | 0,4 | 0,3 |
| 1 | 1 | 2 | 1 | 7  | 2 | 2 | 1 | 2 | 1 | 1 | 1   | 1   | 0,4 |
| 1 | 1 | 1 | 1 | 12 | 2 | 1 | 1 | 2 | 2 | 2 | 1,4 | 4,1 | 3,7 |
| 1 | 1 | 1 | 1 | 18 | 2 | 2 | 1 | 2 | 2 | 1 | 1,1 | 2,5 | 1   |
| 1 | 1 | 1 | 1 | 26 | 2 | 2 | 1 | 2 | 1 | 1 | 1   | 1   | 0,6 |
| 1 | 1 | 1 | 5 | 2  | 2 | 1 | 1 | 2 | 1 | 1 | 0,7 | 0,6 | 0,6 |
| 1 | 1 | 1 | 2 | 17 | 2 | 2 | 1 | 2 | 1 | 1 | 0,9 | 1,2 | 1,2 |
| 1 | 1 | 1 | 3 | 10 | 2 | 2 | 1 | 2 | 1 | 2 | 0,7 | 0,9 | 0,9 |
| 1 | 1 | 1 | 3 | 2  | 2 | 1 | 2 | 1 | 1 | 1 | 0,9 | 0,8 | 0,7 |
| 1 | 1 | 1 | 6 | 2  | 1 | 2 | 1 | 1 | 1 | 1 | 0,7 | 1   | 0,7 |
| 1 | 1 | 1 | 6 | 5  | 1 | 1 | 2 | 1 | 2 | 1 | 0,7 | 1,6 | 0,5 |
| 1 | 1 | 1 | 1 | 7  | 2 | 2 | 1 | 2 | 1 | 1 | 1   | 0,9 | 0,7 |

|   |   |   |   |    |   |   |   |   |   |   |     |     |     |
|---|---|---|---|----|---|---|---|---|---|---|-----|-----|-----|
| 1 | 1 | 1 | 1 | 5  | 1 | 2 | 2 | 1 | 1 | 1 | 0,6 | 0,5 | 0,4 |
| 1 | 1 | 1 | 1 | 20 | 2 | 2 | 1 | 2 | 1 | 1 | 0,7 | 0,7 | 0,6 |
| 1 | 1 | 1 | 1 | 3  | 1 | 1 | 2 | 1 | 2 | 2 | 0,4 | 0,4 | 0,3 |
| 1 | 1 | 1 | 1 | 16 | 2 | 2 | 1 | 2 | 2 | 2 | 0,9 | 0,9 | 0,6 |
| 1 | 1 | 1 | 1 | 7  | 2 | 1 | 1 | 2 | 1 | 1 | 0,4 | 0,7 | 0,3 |
| 1 | 1 | 1 | 7 | 2  | 1 | 1 | 2 | 1 | 2 | 1 | 0,8 | 0,9 | 0,8 |
| 1 | 1 | 1 | 2 | 13 | 2 | 1 | 1 | 2 | 2 | 2 | 1,1 | 4,4 | 2,5 |
| 1 | 1 | 1 | 1 | 5  | 1 | 1 | 2 | 1 | 2 | 2 | 0,5 | 0,5 | 0,5 |
| 1 | 1 | 1 | 1 | 66 | 2 | 2 | 1 | 2 | 1 | 1 | 1   | 1,1 | 0,3 |
| 1 | 1 | 1 | 1 | 10 | 2 | 1 | 1 | 2 | 2 | 1 | 1,2 | 5,6 | 3,3 |
| 1 | 1 | 1 | 3 | 25 | 2 | 2 | 1 | 2 | 1 | 1 | 1,1 | 1,6 | 1,1 |
| 1 | 1 | 1 | 1 | 6  | 1 | 2 | 1 | 1 | 1 | 1 | 0,9 | 1,1 | 0,3 |
| 1 | 1 | 1 | 1 | 5  | 2 | 2 | 1 | 2 | 1 | 1 | 0,7 | 0,9 | 0,6 |
| 1 | 1 | 1 | 1 | 3  | 2 | 2 | 1 | 2 | 1 | 1 | 0,7 | 0,6 | 0,4 |
| 1 | 1 | 1 | 3 | 9  | 2 | 1 | 1 | 2 | 2 | 2 | 0,8 | 1,2 | 0,9 |
| 1 | 1 | 1 | 1 | 5  | 2 | 2 | 1 | 2 | 1 | 1 | 1,4 | 1,2 | 0,8 |
| 1 | 1 | 1 | 4 | 3  | 1 | 1 | 1 | 1 | 2 | 1 | 1,1 | 0,9 | 0,8 |
| 1 | 1 | 1 | 1 | 28 | 2 | 2 | 1 | 2 | 1 | 1 | 1,1 | 1,2 | 0,5 |
| 1 | 1 | 1 | 1 | 7  | 2 | 1 | 1 | 2 | 2 | 1 | 0,9 | 1,3 | 0,7 |
| 1 | 1 | 1 | 1 | 24 | 2 | 2 | 1 | 2 | 1 | 1 | 0,7 | 1   | 0,6 |
| 1 | 1 | 1 | 5 | 4  | 1 | 1 | 1 | 2 | 2 | 2 | 1,1 | 0,9 | 0,9 |
| 1 | 1 | 1 | 1 | 3  | 2 | 1 | 1 | 1 | 2 | 1 | 0,8 | 0,7 | 0,5 |
| 1 | 1 | 1 | 1 | 10 | 2 | 1 | 1 | 2 | 1 | 1 | 0,8 | 0,9 | 0,6 |
| 1 | 1 | 1 | 6 | 7  | 1 | 2 | 2 | 1 | 2 | 2 | 0,6 | 0,6 | 0,5 |
| 1 | 1 | 1 | 4 | 8  | 2 | 1 | 1 | 2 | 2 | 1 | 0,9 | 0,8 | 0,8 |
| 1 | 1 | 1 | 1 | 44 | 2 | 1 | 1 | 2 | 2 | 2 | 1,5 | 2,4 | 2   |
| 1 | 1 | 1 | 2 | 7  | 2 | 1 | 1 | 2 | 2 | 2 | 0,9 | 1,7 | 1,3 |
| 1 | 1 | 1 | 1 | 15 | 2 | 2 | 1 | 2 | 1 | 1 | 0,6 | 0,8 | 0,6 |
| 1 | 1 | 1 | 5 | 3  | 1 | 1 | 1 | 2 | 2 | 1 | 0,7 | 0,5 | 0,5 |
| 1 | 1 | 1 | 1 | 6  | 1 | 1 | 1 | 2 | 1 | 1 | 0,9 | 4,7 | 2,3 |
| 1 | 1 | 1 | 1 | 2  | 1 | 1 | 2 | 1 | 2 | 1 | 0,5 | 0,5 | 0,5 |

|   |   |   |   |    |   |   |   |   |   |   |     |     |     |
|---|---|---|---|----|---|---|---|---|---|---|-----|-----|-----|
| 1 | 1 | 1 | 2 | 10 | 2 | 1 | 1 | 2 | 1 | 1 | 0,6 | 0,4 | 0,3 |
| 1 | 1 | 1 | 6 | 11 | 1 | 1 | 1 | 2 | 2 | 1 | 0,2 | 0,8 | 0,8 |
| 1 | 1 | 1 | 1 | 5  | 2 | 2 | 1 | 2 | 1 | 1 | 0,8 | 0,7 | 0,6 |
| 1 | 1 | 1 | 1 | 24 | 2 | 1 | 1 | 2 | 2 | 1 | 0,9 | 1,8 | 1,6 |
| 1 | 1 | 1 | 1 | 6  | 2 | 2 | 1 | 2 | 1 | 1 | 1,1 | 1,6 | 0,6 |
| 1 | 1 | 1 | 1 | 4  | 2 | 2 | 1 | 2 | 1 | 1 | 0,8 | 1   | 0,6 |
| 1 | 1 | 1 | 1 | 17 | 2 | 1 | 1 | 2 | 1 | 1 | 0,8 | 0,6 | 0,5 |
| 1 | 1 | 1 | 1 | 5  | 2 | 1 | 1 | 2 | 2 | 2 | 1,7 | 4,1 | 4,1 |
| 1 | 1 | 1 | 1 | 6  | 2 | 2 | 1 | 2 | 1 | 1 | 0,9 | 0,8 | 0,7 |
| 1 | 1 | 1 | 1 | 8  | 2 | 2 | 1 | 2 | 2 | 1 | 0,9 | 1,2 | 1   |
| 1 | 1 | 1 | 1 | 5  | 1 | 2 | 2 | 1 | 2 | 1 | 0,5 | 0,4 | 0,4 |
| 1 | 1 | 1 | 1 | 2  | 1 | 1 | 2 | 1 | 1 | 1 | 0,5 | 0,6 | 0,6 |
| 1 | 1 | 1 | 1 | 4  | 1 | 1 | 2 | 1 | 2 | 1 | 0,3 | 0,4 | 0,4 |
| 1 | 1 | 1 | 1 | 36 | 2 | 1 | 1 | 2 | 1 | 1 | 0,7 | 1,1 | 0,9 |
| 1 | 1 | 1 | 6 | 5  | 2 | 1 | 1 | 2 | 2 | 2 | 0,9 | 8,5 | 6   |
| 1 | 1 | 1 | 1 | 21 | 1 | 1 | 1 | 2 | 1 | 1 | 1,2 | 1,2 | 0,7 |
| 1 | 1 | 1 | 1 | 1  | 1 | 1 | 2 | 1 | 1 | 1 | 1,5 | 1,1 | 1,1 |
| 1 | 1 | 1 | 1 | 9  | 1 | 1 | 2 | 1 | 1 | 1 | 1,1 | 1,1 | 0,8 |
| 1 | 1 | 1 | 1 | 2  | 1 | 2 | 2 | 1 | 1 | 1 | 0,8 | 0,7 | 0,7 |
| 1 | 1 | 1 | 1 | 2  | 1 | 1 | 2 | 1 | 1 | 1 | 0,6 | 0,8 | 0,8 |
| 1 | 1 | 1 | 2 | 5  | 1 | 1 | 2 | 1 | 2 | 2 | 0,6 | 0,7 | 0,6 |
| 1 | 1 | 1 | 5 | 4  | 1 | 2 | 2 | 1 | 1 | 1 | 0,4 | 0,4 | 0,4 |
| 1 | 1 | 1 | 6 | 38 | 2 | 1 | 1 | 2 | 2 | 2 | 0,7 | 2,2 | 1,2 |
| 1 | 1 | 1 | 1 | 4  | 2 | 1 | 1 | 2 | 2 | 1 | 0,9 | 1,1 | 1,1 |
| 1 | 1 | 1 | 1 | 21 | 2 | 2 | 1 | 2 | 1 | 1 | 0,8 | 0,8 | 0,5 |
| 1 | 1 | 1 | 1 | 32 | 2 | 2 | 1 | 2 | 1 | 1 | 0,9 | 0,8 | 0,6 |
| 1 | 1 | 1 | 1 | 24 | 2 | 1 | 1 | 2 | 1 | 1 | 0,8 | 0,8 | 0,5 |
| 1 | 1 | 1 | 5 | 26 | 1 | 1 | 1 | 2 | 2 | 1 | 0,9 | 0,7 | 0,4 |
| 1 | 1 | 1 | 1 | 2  | 1 | 1 | 2 | 1 | 1 | 1 | 0,6 | 0,6 | 0,6 |
| 1 | 1 | 1 | 3 | 7  | 1 | 2 | 1 | 2 | 1 | 1 | 0,5 | 0,7 | 0,5 |



|   |   |   |   |   |
|---|---|---|---|---|
| 1 | 1 | 3 | 1 | 1 |
| 1 | 1 | 3 | 2 | 1 |
| 1 | 1 | 3 | 1 | 1 |
| 1 | 1 | 3 | 1 | 1 |
| 4 | 1 | 3 | 1 | 1 |
| 1 | 1 | 3 | 1 | 1 |
| 1 | 1 | 3 | 1 | 1 |
| 1 | 2 | 1 | 2 | 1 |
| 1 | 1 | 3 | 1 | 1 |
| 1 | 1 | 3 | 1 | 1 |
| 1 | 1 | 3 | 1 | 1 |
| 1 | 1 | 3 | 1 | 1 |
| 1 | 1 | 3 | 1 | 1 |
| 1 | 1 | 3 | 1 | 1 |
| 1 | 1 | 3 | 1 | 1 |
| 1 | 1 | 3 | 1 | 1 |
| 1 | 1 | 3 | 1 | 1 |
| 1 | 1 | 3 | 1 | 1 |
| 1 | 2 | 1 | 1 | 2 |
| 1 | 1 | 3 | 1 | 1 |
| 1 | 1 | 3 | 1 | 1 |
| 1 | 2 | 2 | 1 | 4 |
| 1 | 2 | 1 | 1 | 2 |
| 1 | 1 | 3 | 1 | 1 |
| 1 | 1 | 3 | 1 | 1 |
| 1 | 1 | 3 | 1 | 1 |
| 1 | 1 | 3 | 2 | 1 |
| 1 | 1 | 3 | 1 | 1 |
| 3 | 2 | 1 | 1 | 2 |
| 4 | 2 | 1 | 1 | 2 |
| 1 | 1 | 3 | 1 | 1 |

|   |   |   |   |   |
|---|---|---|---|---|
| 1 | 1 | 3 | 1 | 1 |
| 1 | 1 | 3 | 1 | 1 |
| 1 | 1 | 3 | 1 | 1 |
| 1 | 1 | 3 | 1 | 1 |
| 1 | 2 | 1 | 1 | 2 |
| 1 | 1 | 3 | 1 | 1 |
| 1 | 2 | 2 | 1 | 4 |
| 1 | 1 | 3 | 1 | 1 |
| 1 | 2 | 1 | 1 | 2 |
| 1 | 2 | 2 | 2 | 1 |
| 1 | 2 | 1 | 1 | 2 |
| 3 | 1 | 3 | 1 | 1 |
| 1 | 1 | 3 | 1 | 1 |
| 3 | 1 | 3 | 1 | 1 |
| 1 | 2 | 1 | 1 | 3 |
| 1 | 1 | 3 | 1 | 1 |
| 1 | 1 | 3 | 1 | 1 |
| 1 | 1 | 3 | 1 | 1 |
| 1 | 2 | 1 | 1 | 2 |
| 1 | 1 | 3 | 1 | 1 |
| 1 | 1 | 3 | 1 | 1 |
| 1 | 1 | 3 | 1 | 1 |
| 1 | 1 | 3 | 1 | 1 |
| 1 | 1 | 3 | 1 | 1 |
| 1 | 1 | 3 | 1 | 1 |
| 1 | 2 | 1 | 1 | 3 |
| 1 | 2 | 2 | 2 | 1 |
| 1 | 1 | 3 | 1 | 1 |
| 1 | 1 | 3 | 1 | 1 |
| 1 | 2 | 2 | 1 | 4 |
| 3 | 1 | 3 | 1 | 1 |





|           |                                                                                          |
|-----------|------------------------------------------------------------------------------------------|
| ID        | Patient number                                                                           |
| codpesq   | Patient code                                                                             |
| idade     | Age                                                                                      |
| sexo      | Sex                                                                                      |
| corpele   | Self-declaration of skin color                                                           |
| setorig   | Hospital department in which the patient has been originally admitted                    |
| histetil  | History of daily alcohol consumption                                                     |
| tabagis   | Smoking status                                                                           |
| apache_ii | Acute Physiology and Chronic Health Evaluation II (APACHE II)                            |
| cid10     | International Classification of Diseases for Mortality and Morbidity Statistics (ICD-10) |
| comorb    | Comorbidities                                                                            |
| iam       | Myocardial infarction                                                                    |
| icc       | Congestive heart failure                                                                 |
| dvp       | Peripheral vascular disease                                                              |
| dcervasc  | Cerebrovascular disease                                                                  |
| demencia  | Dementia                                                                                 |
| dpulmona  | Chronic lung disease                                                                     |
| dconjunt  | Connective Tissue Disease                                                                |
| ulcera    | Ulcer                                                                                    |
| hepleve   | Liver disease                                                                            |
| dhepseve  | Severe liver disease                                                                     |
| diabetes  | Diabetes                                                                                 |
| diabcomp  | Complications of Diabetes                                                                |
| hemipleg  | Hemiplegia or paraplegia                                                                 |
| drenal    | Kidney disease                                                                           |
| neoplas   | Neoplasms                                                                                |
| leucem    | Leukaemia                                                                                |
| linfoma   | Malignant lymphoma                                                                       |
| metastas  | Malignant neoplasm metastases                                                            |
| aids      | SIDA/HIV                                                                                 |
| preuti    | Hospitalization time before admission to ICU                                             |
| posuti    | Hospitalization time after admission to ICU                                              |
| sedado    | Presence of sedation                                                                     |
| trauma    | Presence of trauma                                                                       |
| vni       | Non-invasive mechanical ventilation                                                      |
| vm        | Mechanical ventilation                                                                   |
| infec     | Infection                                                                                |
| sepsse    | Sepsis                                                                                   |
| cradmiss  | First SCr recorded upon hospital admission                                               |
| cruti     | First SCr measurements at ICU                                                            |
| crultm    | Last SCr measurements at ICU                                                             |
| diurese   | Diuresis measurements                                                                    |
| Ira       | AKI                                                                                      |
| trs       | Renal replacement therapy                                                                |
| desfecho  | Outcome (Discharge, death or transferred to other institutions)                          |
| altalra   | Status of recovery for AKI group                                                         |
